1     Quantification of permethrin resistance and *kdr* alleles in Florida strains  
2                     of *Aedes aegypti* (L.) and *Aedes albopictus* (Skuse)

3  
4     Alden S. Estep<sup>1\*</sup>, Neil D. Sanscrainte<sup>2</sup>, Christy M. Waits<sup>1</sup>, Sarah J. Bernard<sup>1</sup>, Aaron M. Lloyd<sup>3</sup>,  
5     Keira J. Lucas<sup>4</sup>, Eva A. Buckner<sup>5</sup>, Rajeev Vaidyanathan<sup>6</sup>, Rachel Morreale<sup>7</sup>, Lisa A. Conti<sup>8</sup>,  
6     James J. Becnel<sup>2</sup>

7  
8  
9  
10  
11     <sup>1</sup> Navy Entomology Center of Excellence, CMAVE Detachment, Gainesville FL

12     <sup>2</sup> United States Department of Agriculture, Agricultural Research Service, Center for Medical,  
13     Agricultural, and Veterinary Entomology, Mosquito and Fly Research Unit, Gainesville FL

14     <sup>3</sup> Pasco County Mosquito Control District, Odessa, FL

15     <sup>4</sup> Collier County Mosquito Control District, Naples, FL

16     <sup>5</sup> Manatee Mosquito Control District, Palmetto FL

17     <sup>6</sup> Clarke Inc., Saint Charles, IL

18     <sup>7</sup> Lee County Mosquito Control, Lehigh Acres, FL

19     <sup>8</sup> Florida Department of Agriculture and Consumer Services, Tallahassee, FL

20  
21     \* Corresponding author

22     E-mail: [alden.estep@ars.usda.gov](mailto:alden.estep@ars.usda.gov)

## 23 Abstract

24           Recent outbreaks of locally transmitted dengue and Zika viruses in Florida have placed  
25 more emphasis on the importance of integrated vector management plans for *Aedes aegypti* (L.)  
26 and *Aedes albopictus* Skuse. Adulticiding, primarily with pyrethroids, can be the best option  
27 available for the immediate control of potentially arbovirus-infected mosquitoes during outbreak  
28 situations. While pyrethroid resistance is common in *Ae. aegypti* worldwide and testing is  
29 recommended by CDC and WHO, resistance to this class of products has not been widely  
30 examined or quantified in Florida. To address this information gap, we performed the first study  
31 to quantify both pyrethroid resistance and genetic markers of pyrethroid resistance in *Ae. aegypti*  
32 and *Ae. albopictus* strains in Florida. Using direct topical application, we examined 21 *Ae.*  
33 *aegypti* strains from 9 counties and found permethrin resistance (resistance ratio (RR)=6-61-fold)  
34 in all strains when compared to the susceptible ORL1952 control strain. Permethrin resistance in  
35 five strains of *Ae. albopictus* was very low (RR<1.6) even when collected from the same  
36 containers producing resistant *Ae. aegypti*. Characterization of two sodium channel *kdr* alleles  
37 associated with pyrethroid-resistance showed widespread distribution in 62 strains of *Ae.*  
38 *aegypti*. The 1534 phenylalanine to cysteine (F1534C) single nucleotide polymorphism SNP was  
39 fixed or nearly fixed in all strains regardless of RR. We observed much more variation in the  
40 1016 valine to isoleucine (V1016I) allele and observed that increasing frequency of the  
41 homozygous V1016I allele correlates strongly with increased RR (Pearson corr= 0.905). In  
42 agreement with previous studies, we observed a very low frequency of three *kdr* genotypes, IIFF,  
43 VIFF, and IIFC. In this study, we provide a statewide examination of pyrethroid resistance, and  
44 demonstrate that permethrin resistance and the genetic markers for resistance are widely present  
45 in FL *Ae. aegypti*. Resistance testing should be included in an effective management program.

## 46 **Author Summary**

47 *Aedes aegypti* and *Aedes albopictus* can vector a variety of arboviruses that cause  
48 diseases and are thus a public health concern. Pyrethroid insecticide resistance is common in  
49 *Aedes aegypti* in many locations worldwide and can adversely affect vector control operations.  
50 However, the resistance status of these vectors in Florida is largely unreported and recent local  
51 transmission of dengue and Zika viruses has made this information critical for effective control  
52 operations. In this study, we showed that permethrin resistance and two common SNPs of the  
53 voltage gated sodium channel (V1016I and F1534C) previously associated with pyrethroid  
54 resistance were widely present in Florida *Aedes aegypti* strains. We also observed a strong  
55 correlation between the IICC genotype and RR as determined by topical application, which  
56 suggests, as have others, that *kdr* frequency may be a useful indicator of resistance in *Aedes*  
57 *aegypti*.

## 58 **Introduction**

59 Local vector control programs play a part in public health. In many countries, these  
60 programs serve as the primary defense against the spread of several mosquito-borne diseases.  
61 Effective Integrated Vector Management (IVM) programs rely on surveillance information  
62 coupled with multiple vector control strategies, such as chemical adulticiding, when needed to  
63 reduce vector populations as well as arbovirus transmission. Limited recent transmission of  
64 locally acquired dengue and Zika viruses in the southeastern continental US, primarily Florida,  
65 has brought renewed attention to the importance of IVM programs where the potential vectors,  
66 *Aedes aegypti* (L.) and *Ae. albopictus* Skuse, have long been present. However, for IVM  
67 programs in Florida to effectively control *Aedes* vectors and to reduce dengue and Zika virus

68 transmission during an outbreak, it is essential to know which adulticide products are effective  
69 against local *Ae. aegypti* and *Ae. albopictus* strains.

70 Organophosphates and pyrethroids are the only two classes of insecticides available for  
71 public health use to control adult mosquitoes in the US. Compared to organophosphate  
72 insecticides, pyrethroids have higher public acceptance, rapid knockdown, relatively low costs,  
73 and are generally the product class of choice when adulticiding is required [1] Unfortunately,  
74 years of pyrethroid insecticide use and previous DDT usage has increased the frequency of  
75 genetic and enzymatic resistance in insects like mosquitoes. Genetic target site changes of the  
76 sodium channel, known as knockdown resistance (*kdr*) mutations, are a relatively common insect  
77 response to selective pressure by pyrethroids [2,3]. Although a variety of other single nucleotide  
78 polymorphisms (SNPs) have been noted, in *Ae. aegypti*, the primary two SNPs linked to  
79 pyrethroid resistance are at codons 1016 and 1534 (positions according to standard *M. domestica*  
80 notation) [4,5]. One allele of the 1016 mutation is geographically distinct to the Western  
81 hemisphere and results in the replacement of the normal valine with an isoleucine (V1016I),  
82 while the 1534 mutation results in a phenylalanine to cysteine change (F1534C). There is  
83 currently debate about the individual toxicological effect of these two mutations, but they are  
84 consistently present in resistant strains [4]. Heterozygous and homozygous combinations of these  
85 two SNPs could result in nine possible genotypes, but strong linkage between the SNPs has been  
86 noted with only six of the genotypes observed in a study of Mexican *Ae. aegypti* [6].

87 Pyrethroid resistance and *kdr* alleles have been well documented in *Ae. aegypti* strains  
88 from Central America, South America and the Caribbean [7-11]. Recent testing as part of the  
89 Zika emergency response in Puerto Rico has shown that isolated, early reports of resistance were  
90 indicative of widespread resistance on the island [11-14]. Studies have also shown the pyrethroid

91 resistance is not specific to a particular chemical but is generally class-wide to type I, type II, and  
92 non-ester pyrethroids [11, 15, 16]. *Kdr* alleles and pyrethroid resistance are widely distributed in  
93 Mexico, including Nuevo Laredo which lies just south of the US-Mexico border [9].

94 In contrast, little has been published about pyrethroid resistance in *Aedes* strains within  
95 the continental US. In the Garcia et al. [9] study mentioned above, the authors did not find *kdr*  
96 alleles in a Houston, TX collection during 1999. Two recent reviews of the *Aedes* resistance  
97 literature listed no reports of resistance in continental US *Ae. aegypti* [4, 17], but Cornel et al.  
98 [18] recently demonstrated toxicological resistance and sodium channel mutations in invasive  
99 populations of *Ae. aegypti* in California. Two recent studies using CDC bottle bioassays do  
100 indicate resistance in strains from the southern US, but these studies do not provide any  
101 quantification of the strength of the resistance nor did they examine the presence of *kdr* alleles  
102 [19, 20]. In contrast, *Ae. albopictus* does not appear to frequently develop *kdr* resistance, and  
103 most US strains tested thus far have only shown very minimal pyrethroid resistance [4, 21, 22].

104 Resistance surveillance is recommended by the CDC and statewide initiatives to map  
105 pyrethroid resistance have begun in Florida and California [20,23]. Resistance information is  
106 critically important as strong pyrethroid resistance can cause failure of adulticiding control  
107 interventions. In this study, a collaborative group of government, academic, industry and vector  
108 control district stakeholders collected *Ae. aegypti* and *Ae. albopictus* adults, eggs or larvae from  
109 more than 200 locations throughout Florida to assess the extent and intensity of pyrethroid  
110 resistance. The goal of this study was to improve vector control operations by producing a  
111 resistance map and apply this information to make more effective control decisions. We used  
112 direct topical application of permethrin to determine resistance ratios (RRs) relative to the  
113 susceptible ORL1952 strain for 21 wild type strains of *Ae. aegypti* and 5 strains of *Ae.*

114 *albopictus*. Nearly 5,000 *Ae. aegypti* from numerous locations were genotyped by allele-specific  
115 PCR to assess the frequency of V1016I and F1534C alleles and rapidly visualize the pattern of  
116 resistance throughout the state of Florida.

## 117 **Methods**

### 118 **Mosquito strains and rearing**

119 The toxicological profiles and rearing procedures for the susceptible (ORL1952) and  
120 resistant (Puerto Rico -BEIResources, NR-48830) strains of *Ae. aegypti* used in this study have  
121 been described previously [15]. Strain information, including specific location information,  
122 collectors, and dates of collection are noted in Table 1. Field strains for toxicology testing were  
123 often collected as mixed (*Ae. albopictus* and *Ae. aegypti*) eggs laid on seed germination paper  
124 (Anchor Paper, St. Paul, MN) placed in a variety of oviposition containers including black  
125 plastic stadium cups, plastic cemetery vases, and glass containers. Field collected eggs were  
126 hatched by soaking papers for 48-72 hours at 27°C in rearing trays of untreated well water or  
127 deionized water (diH<sub>2</sub>O). Papers were carefully removed and larvae were reared through adult  
128 emergence with a quarter ration of 3:2 larval food compared to the standard rearing method for  
129 the ORL1952 susceptible strain [24] due to sensitivity to overfeeding. Strains from Monroe,  
130 Seminole, Orange, Hernando and Sarasota counties were collected as larvae from a variety of  
131 manmade and natural containers (tires, plant pots, bottles, buckets, etc.), rinsed with diH<sub>2</sub>O and  
132 then placed into the standard larval rearing procedure described above. Pupae were collected  
133 from rearing trays and placed in emergence chambers or 12"x12" screen cages (BioQuip Models  
134 1425 & 1450B, Rancho Dominguez, CA). After emergence, wildtype mosquitoes were briefly  
135 chilled to 4°C and sorted to species. Strains for toxicology testing were produced from locations

136 that had more than 30 wildtype founders. If multiple nearby locations were combined to produce  
137 a strain, the GPS location in Table 1 represents the GPS centroid of the sites that contributed the  
138 mosquitoes. Individual oviposition cup locations and life stages tested are provided in S1 File.  
139 Eggs were produced using standard rearing methods [15]. Colony strains were provided 2-10  
140 blood-meals on weekly intervals to collect F1 eggs using warmed bovine blood. If feeding was  
141 poor, warmed blood was spiked with 1mM ATP as a phagostimulant. Bovine blood for mosquito  
142 feeding was purchased by the USDA under a contract with a local, licensed abattoir. Blood was  
143 collected during normal operations of the abattoir from the waste stream after animal slaughter.  
144 Under CFR9, Parts 1-3, tissues, including blood, collected from dead livestock intended as food  
145 are exempt from IACUC regulation.

146 *Aedes aegypti* strains from St. Augustine, Clearwater, and Vero Beach, FL were provided  
147 as F1 eggs produced at Anastasia Mosquito Control District, Pinellas County Mosquito Control,  
148 and the Florida Medical Entomology Laboratory, respectively.

149 **Table 1. Collection information for Florida *Aedes aegypti* and *Ae. albopictus* used in this study.**

| County       | Strain               | Species               | GPS Centroid    | Collection Date | Collection Location |
|--------------|----------------------|-----------------------|-----------------|-----------------|---------------------|
| Brevard      | South Brevard        | <i>Ae. aegypti</i>    | -80.672, 28.055 | 6/9/2016        |                     |
| Broward      | Deerfield-Tivoli     | <i>Ae. aegypti</i>    | -80.115, 26.307 | 6/7/2017        |                     |
| Broward      | Deerfield-Cocoa Cay  | <i>Ae. aegypti</i>    | -80.099, 26.307 | 6/7/2017        |                     |
| Broward      | Fort Lauderdale      | <i>Ae. aegypti</i>    | -80.181, 26.169 | 6/7/2017        |                     |
| Collier      | Naples Park          | <i>Ae. aegypti</i>    | -81.809, 26.262 | 6/8/2017        | R. Ba               |
| Collier      | Old Naples           | <i>Ae. aegypti</i>    | -81.798, 26.141 | 6/8/2017        | R. Ba               |
| Collier      | Golden Gate City     | <i>Ae. aegypti</i>    | -81.695, 26.188 | 6/8/2017        | R. Ba               |
| Collier      | East Naples          | <i>Ae. aegypti</i>    | -81.768, 26.125 | 6/8/2017        | R. Ba               |
| Duval        | Aberdeen             | <i>Ae. aegypti</i>    | -81.701, 30.303 | 9/1/2016        | C. W                |
| Duval        | Jean St.             | <i>Ae. aegypti</i>    | -81.710, 30.298 | 9/1/2016        | C. W                |
| Hernando     | Brooksville          | <i>Ae. aegypti</i>    | -82.553, 28.450 | 7/1/2016        | Sanscrainte         |
| Hernando     | Brooksville          | <i>Ae. albopictus</i> | -82.390, 28.557 | 7/1/2016        | Sanscrainte         |
| Hillsborough | Marti Cemetery       | <i>Ae. aegypti</i>    | -82.494, 27.966 | 7/1/2014        | Estep/Be            |
| Indian River | Vero Beach           | <i>Ae. aegypti</i>    | -80.419, 27.641 | 3/1/2016        | R.                  |
| Lee          | Alva                 | <i>Ae. aegypti</i>    | -81.609, 26.715 | 4/5/2016        | R. Mor              |
| Lee          | Alva                 | <i>Ae. albopictus</i> | -81.609, 26.715 | 4/5/2016        | R. Mor              |
| Lee          | Cen. Cape Coral      | <i>Ae. aegypti</i>    | -81.945, 26.562 | 4/5/2016        | R. Mor              |
| Lee          | Cen. Lehigh Acres    | <i>Ae. aegypti</i>    | -81.626, 26.610 | 4/5/2016        | R. Mor              |
| Lee          | Fort Myers           | <i>Ae. aegypti</i>    | -81.887, 26.617 | 4/5/2016        | R. Mor              |
| Lee          | Banyan Creek         | <i>Ae. aegypti</i>    | -81.966, 26.502 | 4/5/2016        | R. Mor              |
| Lee          | San Carlos           | <i>Ae. aegypti</i>    | -81.820, 26.472 | 4/5/2016        | R. Mor              |
| Manatee      | Palmetto             | <i>Ae. aegypti</i>    | -82.559, 27.550 | 4/6/2016        | E.                  |
| Manatee      | Cortez               | <i>Ae. aegypti</i>    | -82.685, 27.468 | 4/6/2016        | E.                  |
| Manatee      | South Bradenton      | <i>Ae. aegypti</i>    | -82.663, 27.459 | 4/6/2016        | E.                  |
| Manatee      | Longboat Key         | <i>Ae. aegypti</i>    | -82.682, 27.437 | 4/6/2016        | E.                  |
| Manatee      | Anna Maria Island    | <i>Ae. aegypti</i>    | -82.739, 27.533 | 4/6/2016        | E.                  |
| Martin       | Jensen Beach         | <i>Ae. aegypti</i>    | -80.227, 27.245 | 8/9/2017        |                     |
| Miami-Dade   | North Little River   | <i>Ae. aegypti</i>    | -80.207, 25.843 | 12/2016-01/2017 | C                   |
| Miami-Dade   | Central Little River | <i>Ae. aegypti</i>    | -80.202, 25.840 | 12/2016-01/2017 | C                   |
| Miami-Dade   | Central Little River | <i>Ae. albopictus</i> | -80.202, 25.840 | 12/2016-01/2017 | C                   |
| Miami-Dade   | South Little River   | <i>Ae. aegypti</i>    | -80.206, 25.836 | 12/2016-01/2017 | C                   |
| Miami-Dade   | Miami Beach          | <i>Ae. aegypti</i>    | -80.136, 25.807 | 10/12/2016      | C                   |
| Miami-Dade   | North Wynwood        | <i>Ae. aegypti</i>    | -80.198, 25.808 | 10/11/2016      | C                   |
| Miami-Dade   | Central Wynwood      | <i>Ae. aegypti</i>    | -80.200, 25.801 | 10/11/2016      | C                   |



|            |                      |                       |                 |            |                 |
|------------|----------------------|-----------------------|-----------------|------------|-----------------|
| Miami-Dade | Central Wynwood      | <i>Ae. aegypti</i>    | -80.200, 25.801 | 10/11/2016 | C               |
| Miami-Dade | East Wynwood         | <i>Ae. aegypti</i>    | -80.191, 25.801 | 10/11/2016 | C               |
| Miami-Dade | Homestead I          | <i>Ae. aegypti</i>    | -80.475, 25.475 | 12/1/2016  | C               |
| Miami-Dade | Homestead II         | <i>Ae. aegypti</i>    | -80.452, 25.459 | 12/1/2016  | C               |
| Miami-Dade | Coconut Grove        | <i>Ae. aegypti</i>    | -80.233, 25.736 | 1/2/2017   | C               |
| Miami-Dade | Coral Gables         | <i>Ae. aegypti</i>    | -80.269, 25.719 | 11/12/2016 | C               |
| Miami-Dade | Aventura             | <i>Ae. aegypti</i>    | -80.140, 25.958 | 2/1/2017   | C               |
| Miami-Dade | Hialeah              | <i>Ae. aegypti</i>    | -80.291, 25.853 | 1/2/2017   | C               |
| Miami-Dade | Miami Lakes          | <i>Ae. aegypti</i>    | -80.314, 25.908 | 1/2/2017   | C               |
| Miami-Dade | Kendall              | <i>Ae. aegypti</i>    | -80.353, 25.681 | 3/5/2017   | C               |
| Miami-Dade | Doral                | <i>Ae. aegypti</i>    | -80.367, 25.811 | 1/2/2017   | C               |
| Miami-Dade | Sunny Isles          | <i>Ae. aegypti</i>    | -80.123, 25.945 | 1/3/2017   | C               |
| Miami-Dade | Brickell             | <i>Ae. aegypti</i>    | -80.195, 25.762 | 4/1/2017   | C               |
| Monroe     | Big Coppitt Key      | <i>Ae. aegypti</i>    | -81.663, 24.600 | 2/1/2016   | A. Estep/ D. J. |
| Orange     | Orlando              | <i>Ae. aegypti</i>    | -81.442, 28.551 | 5/1/2016   | K. Deutsc       |
| Orange     | Orlando              | <i>Ae. albopictus</i> | -81.442, 28.551 | 5/1/2016   | K. Deutsc       |
| Pasco      | Port Richey-Stell    | <i>Ae. aegypti</i>    | -82.689, 28.257 | 6/8/2017   | A. Janusa       |
| Pasco      | Port Richey-Congress | <i>Ae. aegypti</i>    | -82.707, 28.257 | 6/8/2017   | A. Janusa       |
| Pasco      | Port Richey-Pineland | <i>Ae. aegypti</i>    | -82.706, 28.323 | 6/8/2017   | A. Janusa       |
| Pasco      | Port Richey-Gulf     | <i>Ae. aegypti</i>    | -82.690, 28.327 | 6/8/2017   | A. Janusa       |
| Pasco      | Holiday-Buena Vista  | <i>Ae. aegypti</i>    | -82.744, 28.184 | 6/8/2017   | A. Janusa       |
| Pasco      | Holiday-Scandia      | <i>Ae. aegypti</i>    | -82.738, 28.186 | 6/8/2017   | A. Janusa       |
| Pasco      | Elfers-Grove Park    | <i>Ae. aegypti</i>    | -82.733, 28.220 | 6/8/2017   | A. Janusa       |
| Pasco      | Elfers-Virginia City | <i>Ae. aegypti</i>    | -82.710, 28.220 | 6/8/2017   | A. Janusa       |
| Pasco      | Zephyr Hills         | <i>Ae. aegypti</i>    | -82.182, 28.239 | 6/1/2014   | A. Llo          |
| Pinellas   | Clearwater           | <i>Ae. aegypti</i>    | -82.784, 27.948 | 9/1/2016   | .               |
| Sarasota   | Sarasota             | <i>Ae. aegypti</i>    | -82.469, 27.213 | 9/1/2017   | W. Bren         |
| Seminole   | Altamonte Springs    | <i>Ae. aegypti</i>    | -81.406, 26.686 | 5/1/2016   | T. Jones        |
| Seminole   | Winter Park          | <i>Ae. aegypti</i>    | -81.323, 28.622 | 5/1/2016   | T. Jones        |
| St. Johns  | Lighthouse           | <i>Ae. aegypti</i>    | -81.314, 29.897 | 6/7/2016   | J.              |
| St. Johns  | Spanish Street       | <i>Ae. aegypti</i>    | -81.314, 29.896 | 6/7/2016   | J.              |

150 GPS locations of strains represent the GPS centroid of multiple oviposition collections. Individual  
 151 locations are listed in supplemental information.

152 To produce mosquitoes for bioassay testing, eggs from the F1 or F2 generation of field  
153 collected strains, the lab susceptible strains (ORL1952) and the pyrethroid-resistant strain were  
154 hatched and reared as described above in covered trays at a density of approximately 1000  
155 mosquito larvae/tray. Adult mosquitoes were allowed to emerge into 12"x12" screen cages and  
156 provided with cotton saturated with 10% sucrose in diH<sub>2</sub>O. Females used for bioassays were 3-7  
157 days post-emergence.

### 158 **Determination of resistance ratio by topical application**

159 The adult topical bioassay has been described previously in detail [24, 25]. For these  
160 studies, the permethrin stock solution in DMSO (Product #N-12848-250MG, Chemservice,  
161 Westchester, PA) and all dilutions in acetone were prepared gravimetrically. An initial 10-fold  
162 dilution series was prepared over a range of relevant concentrations [15]. Sub-dilutions were  
163 prepared from the 10-fold dilution series as necessary to determine the critical region of the dose  
164 curve. Three assays (n=3) were performed for all strains with listed LD<sub>50</sub>s unless limited  
165 numbers of F1 test mosquitoes allowed only two replicates. Average mass/female was calculated  
166 for each strain by weighing a cohort of 50-100 females before each replicate.

167 LD<sub>50</sub>s, standard errors, and goodness of fit were determined from dose-mortality curves  
168 using SigmaPlot v13 (Systat software Inc., San Jose, CA) with data fit to a four parameter  
169 logistic model. To provide a comparative metric between strains that may have different body  
170 sizes, doses applied were divided by the average mass of the mosquitoes before curve fitting.  
171 This results in an LD<sub>50</sub> of ng of active ingredient per mg of mosquito. Resistance ratios for  
172 strains were calculated using the LD<sub>50</sub> of the field strain divided by the LD<sub>50</sub> of the susceptible  
173 ORL1952 strain included in the same assay. In this study, we use the WHO scale to define the

174 levels of resistance [26]. When RR is less than 5, the field population is considered susceptible.  
175 When the RR is between 5 and 10, the mosquitoes are considered to have moderate resistance. A  
176 RR greater than 10 indicates that mosquitoes are highly resistant [27].

### 177 **Strain *kdr* genotyping**

178 Genotypes for individual mosquitoes or eggs were determined using melt curve analysis  
179 with previously described allele-specific primers for the 1016 and 1534 SNPs [28, 29]. Assays  
180 were performed in 96 well plates on a StepOnePlus (Applied Biosystems) or QuantStudio5  
181 (Applied Biosystems, Thermo Fisher Scientific, Waltham, MA) using SYBR green chemistry.  
182 Plates were loaded with 8 $\mu$ l of PCR master mix containing SYBR Select Master Mix (Applied  
183 Biosystems, Thermo Fisher Scientific, Waltham, MA), nuclease free water (NFW), and three  
184 balanced primers (Table 2). Primer balancing was necessary to ensure that the resulting melt  
185 curves would be accurately called by the analysis software. Individual adult females were  
186 homogenized for 60 seconds at max speed in 100 $\mu$ l of NFW on a bead beater (BioSpec,  
187 Bartlesville, OK). Individual eggs were similarly treated but homogenized in 30 $\mu$ l of NFW.  
188 Immediately after homogenization, samples were centrifuged at 10,000 relative centrifugal force  
189 (rcf) for 60 seconds to pellet solids. Two microliters of each supernatant were added to 8 $\mu$ l of  
190 PCR mix for each primer set and then subjected to standard cycling conditions (3min @ 95°C;  
191 40 cycles @ 95°C for 3 sec, 60°C for 15 sec). Melt curve analysis followed cycling with  
192 acquisition of fluorescence data every 0.3°C as the temperature was ramped from 60°C to 95°C.  
193 Characteristic melting temperature ( $T_m$ ) peaks in the derivative fluorescence data indicate the  
194 presence of specific alleles [28, 29]. For the 1016 mutation, a codon for the susceptible valine  
195 has a  $T_m$  peak at 86 $\pm$ 0.3°C while the isoleucine codon has a  $T_m$  of 77.3 $\pm$ 0.3°C. The 1534  
196 phenylalanine has a  $T_m$  of 79.8 $\pm$ 0.3°C while the mutant cysteine produces a peak at 84.7 $\pm$ 0.3°C.

197 Homozygotes for either allele produce one peak while heterozygotes produce peaks at both  $T_{ms}$ .  
198 All assay plates included two susceptible ORL1952 strain and two resistant PR strain samples as  
199 negative and positive controls, respectively. Most plates also contained artificial heterozygotes  
200 created by including ORL1952 and PR homogenates in the same sample. Well positions of  
201 individual mosquitoes were maintained in both plates (one plate for each locus) to allow  
202 genotyping of an individual for both SNPs. Frequencies for each of the nine genotypes (VVFF,  
203 VVFC, VVCC, VIFF, VIFC, VICC, IIFF, IIFC, IICC) were calculated by dividing the specific  
204 genotype by the total number tested from each area.

205 **Table 2. PCR primers used for *kdr* allele analysis.**

| Primer name          | Sequence (5'-3') <sup>c</sup>                         | Code |
|----------------------|-------------------------------------------------------|------|
| 1016V <sup>a</sup>   | [GCGGGCAGGGCGGCGGGGGCGGGGCC]ACAAATTGTTTCCCACCCGCACCGG | GTA  |
| 1016I <sup>a</sup>   | [GCGGGC]ACAAATTGTTTCCCACCCGCACTGA                     | ATA  |
| 1016Rev <sup>a</sup> | GGATGAACCSAAATTGGACAAAAGC                             | Both |
| 1534F <sup>b</sup>   | [GCGGGC]TCTACTTTGTGTTCTTCATCATATT                     | CTT  |
| 1534C <sup>b</sup>   | [GCGGGCAGGGCGGCGGGGGCGGGGCC]TCTACTTTGTGTTCTTCATCATGTG | CTG  |
| 1534Rev <sup>b</sup> | TCTGCTCGTTGAAGTTGTCGAT                                | Both |

206 <sup>a</sup>Primers designed by [28].

207 <sup>b</sup>Primers designed by [29].

208 <sup>c</sup>Bases in brackets represent non sequence specific tails added to separate melting temperatures.

## 209 **Mapping**

210 Base maps in this publication were created using ArcGIS® software by Esri. ArcGIS® is the  
211 intellectual property of ESRI and is used herein under license. Copyright © ESRI. GIS data  
212 sources were ESRI and Tele Atlas. All rights reserved. (For more information about Esri®  
213 software, please visit [www.esri.com](http://www.esri.com).) Permission to publish this content was verified from the  
214 ESRI Redistribution Rights Matrix at  
215 [https://www.esri.com/~media/Files/Pdfs/legal/pdfs/redist\\_rights\\_106.pdf?la=en](https://www.esri.com/~media/Files/Pdfs/legal/pdfs/redist_rights_106.pdf?la=en)

216 Maps were exported to GIMP2.8 and additional layers with the *kdr* or resistance ratio data from  
217 this manuscript was added. Pie chart representations of *kdr* allele frequencies were created with  
218 Microsoft excel and exported to layers added to the basemaps.

## 219 **Results**

220 **Topical bioassay**

221 All Florida strains of *Ae. aegypti* were resistant to permethrin when compared to the  
222 ORL1952 strain, which has been in a continuous laboratory colony for nearly seventy years (Fig  
223 1). The field strains showed varied levels of resistance, from 6-fold to 61-fold compared to the  
224 ORL1952 strain. The two most susceptible *Ae. aegypti* strains were collected from flowerpots on  
225 Big Coppitt Key (Monroe County) and from oviposition cups in Cortez (Manatee County) at 6.0  
226 and 6.8-fold, respectively. *Ae. aegypti* mosquitoes collected from a tire facility in Orlando  
227 (Orange County) were about 17.2-fold more resistant than *Ae. aegypti* collected from the same  
228 area generations earlier and used to produce the ORL1952 strain. While most of the FL strains  
229 were 15 to 35-fold resistant compared to the lab strains, several strains with higher RR were  
230 identified. The strain from New Port Richey in Pasco County had the highest RR at 61.8-fold,  
231 which is similar to the RR of the Puerto Rico-resistant reference strain [15]. Strains from Miami  
232 Beach and Fort Myers had RRs above 50.

233 The variability we observed in RR throughout the state was also seen at finer resolution  
234 within several, but not all, counties. In Miami-Dade County, the Miami Beach and East  
235 Wynwood strains were relatively resistant (58-fold and 33-fold), while nearby locations like  
236 South Wynwood and central Little River were much more susceptible (Fig 3). Manatee County  
237 also had a range of RRs. The Anna Maria Island strain, collected from a densely populated  
238 barrier island, had a higher RR than nearby strains from Palmetto or Cortez (Fig 1 and Table 3).  
239 We also observed this same trend in Lee County but did not observe universal variation in RR.

240 **Table 3. Permethrin resistance ratios of select Florida strains of *Aedes aegypti* and *Ae.***  
 241 ***albopictus* calculated from direct topical application.**

| County          | Strain             | Species               | LD50±SE (ng/mg) | Resistance Ratio |
|-----------------|--------------------|-----------------------|-----------------|------------------|
| Lab susceptible | ORL1952            | <i>Ae. aegypti</i>    | 0.06±0.01       | 1                |
| Manatee         | Anna Maria         | <i>Ae. aegypti</i>    | 2.03±0.22       | 35               |
| Manatee         | Palmetto           | <i>Ae. aegypti</i>    | 0.77±0.13       | 13.3             |
| Manatee         | South Bradenton    | <i>Ae. aegypti</i>    | 1.11±0.18       | 19.2             |
| Manatee         | Longboat Key       | <i>Ae. aegypti</i>    | 0.96±0.13       | 16.6             |
| Manatee         | Cortez             | <i>Ae. aegypti</i>    | 0.39±0.06       | 6.8              |
| Monroe          | Big Coppitt Key    | <i>Ae. aegypti</i>    | 0.35±0.05       | 6                |
| Orange          | Orlando            | <i>Ae. aegypti</i>    | 1.34±0.25       | 17.2             |
| Orange          | Orlando            | <i>Ae. albopictus</i> | 0.10±0.02       | 1.3              |
| Seminole        | Altamonte Springs  | <i>Ae. aegypti</i>    | 1.42±0.24       | 18.1             |
| Duval           | Jacksonville-4     | <i>Ae. aegypti</i>    | 2.58±0.24       | 33               |
| Hernando        | Brooksville        | <i>Ae. albopictus</i> | 0.12±0.03       | 1.5              |
| Lee             | Alva               | <i>Ae. aegypti</i>    | 1.63±0.45       | 16.3             |
| Lee             | Alva               | <i>Ae. albopictus</i> | 0.07±0.05       | 1                |
| Lee             | Fort Myers         | <i>Ae. aegypti</i>    | 4.97±0.47       | 56.8             |
| Lee             | South Cape Coral   | <i>Ae. aegypti</i>    | 2.90±0.43       | 29.2             |
| Lee             | Central Cape Coral | <i>Ae. aegypti</i>    | 4.05±0.65       | 40.7             |

|            |                      |                       |           |      |
|------------|----------------------|-----------------------|-----------|------|
| Miami-Dade | Wynwood North        | <i>Ae. aegypti</i>    | 2.64±0.57 | 21.5 |
| Miami-Dade | Wynwood Central      | <i>Ae. Aegypti</i>    | 2.15±0.62 | 17.5 |
| Miami-Dade | Wynwood East         | <i>Ae. aegypti</i>    | 4.11±0.64 | 33.5 |
| Miami-Dade | Wynwood South        | <i>Ae. aegypti</i>    | 2.60±0.44 | 21.2 |
| Miami-Dade | Wynwood South        | <i>Ae. albopictus</i> | 0.17±0.02 | 1.4  |
| Miami-Dade | Little River North   | <i>Ae. aegypti</i>    | 2.19±0.43 | 17.9 |
| Miami-Dade | Little River Central | <i>Ae. aegypti</i>    | 3.46±1.21 | 28.2 |
| Miami-Dade | Little River Central | <i>Ae. albopictus</i> | 0.20±0.02 | 1.6  |
| Miami-Dade | Miami Beach          | <i>Ae. aegypti</i>    | 6.96±1.36 | 56.7 |

242

243 *Aedes albopictus* competes with *Ae. aegypti* for oviposition sites, and in several locations  
244 *Ae. albopictus* eggs were collected in conjunction with *Ae. aegypti* eggs. *Ae. albopictus* strains  
245 reared were also subjected to topical application along with the *Ae. aegypti* counterparts from the  
246 same locations (Fig 1, in blue). In the *Ae. albopictus* strains we tested, only slight resistance to  
247 permethrin (<2-fold) was observed when compared to the ORL1952 strain. In Miami-Dade  
248 County, we observed large differences in RR between *Ae. albopictus* and *Ae. aegypti* even when  
249 collected from the same sites in areas such as south Wynwood and central Little River. Duval  
250 (Jacksonville), Orange (Orlando), and Lee (Alva) counties also had resistant *Ae. aegypti* and low  
251 RR *Ae. albopictus*.

252 **Figure 1. Permethrin resistance ratios of *Ae. aegypti* and *Ae. albopictus* (in blue) strains**  
253 **compared to the susceptible ORL1952 laboratory strain.** Base maps were sourced from ESRI



254 and Tele Atlas data through ArcGIS Online under an enterprise license with USDA. Additional  
255 layers were added to the base map using GIMP 2.8

## 256 ***Kdr* allele distribution**

257 Examination of *kdr* alleles in *Ae. aegypti* strains from 62 locations showed a range of  
258 genotypes (Fig 2 and Fig 3). We observed that most strains were fixed or nearly fixed for the  
259 F1534C SNP. For many strains, more than 95% of the tested mosquitoes were homozygous for  
260 the 1534C (1534CC) and the remainder of the strain was made up of a few 1534 heterozygotes  
261 (1534FC). Only strains from Big Coppitt Key (13% FC), Cortez in Manatee County (38% FC),  
262 Central Wynwood (22% FC) and 2 strains from Little River (20% and 14% FC) had more than  
263 10% of mosquitoes that were heterozygous at position 1534. Most strains had no mosquitoes  
264 without at least one copy of the 1534C allele but we did find two strains from central Wynwood  
265 (8%FF) and Cortez (11% FF) that still had appreciable numbers of susceptible alleles.

266

267 **Figure 2. Frequency of *kdr* genotypes in 40 strains of FL *Aedes aegypti*.** Genotype  
268 frequencies were determined using the methods of [28, 29] as described in the methods section.  
269 Specific collection locations that are included in each tested population are noted in  
270 Supplemental File 1. Strains included a minimum of 25 individual organisms. Base maps were  
271 sourced from ESRI and Tele Atlas data through ArcGIS Online under an enterprise license with  
272 USDA. Additional layers were added to the base map using GIMP 2.8. Graphical representation  
273 of *kdr* frequencies was produced using Microsoft Excel and included as an additional layer.

274

275 **Figure 3. *Kdr* genotype frequencies in 20 populations of *Aedes aegypti* from Miami-Dade**  
276 **County, FL.** Genotype frequencies were determined using the methods of [28, 29] as described  
277 in the methods section. Specific collection locations that are included in each tested population  
278 are noted in Supplemental File 1. All data is based on a minimum of 76 tested individuals. Base  
279 maps were sourced from ESRI and Tele Atlas data through ArcGIS Online under an enterprise  
280 license with USDA. Additional layers were added to the base map using GIMP 2.8. Graphical  
281 representation of *kdr* frequencies was produced using Microsoft Excel and included as an  
282 additional layer.

283

284 There was much more variation throughout the state at position 1016. Strains from Big  
285 Coppitt Key, Longboat Key, Orlando and Clearwater had the lowest percentages of the  
286 homozygous 1016II at 11.0, 14.1, 14.9, and 17.8%, respectively. We did observe strains with  
287 high levels of 1016II. Six of eight strains examined from Pasco County had 1016II frequencies  
288 above 75%, including two strains from New Port Richey at 100% 1016II. Due to the 2016 Zika  
289 outbreak and resulting massive public health response, we heavily sampled strains from  
290 southeast Florida for allele frequencies. Two strains from Broward and several from Miami-  
291 Dade County had 1016II frequencies above 75% including a Miami Beach strain at 91% 1016II  
292 (Fig 3). Select strains from Lee and Collier counties in southwest Florida also were above 75%  
293 1016II (Fig 2).

294 As with RR, in several counties we observed large differences in allele frequency from  
295 one part of the county to another. In Lee County (Fig 2), an inland strain from Alva had a  
296 relatively low level 1016II frequency (20%) while four strains from near the Gulf Coast all had

297 1016II frequencies of greater than 55%. This variation was also observed at much closer scale  
298 between strains in neighboring cities. The Manatee County Anna Maria Island strain had a much  
299 higher 1016II allele frequency than nearby strains from Palmetto or Longboat Key (Fig 2). While  
300 overall IICC frequencies were high in Pasco County, we did find variation at the neighborhood  
301 level in south Pasco County, where a strain with 75% 1016II was found just blocks from a strain  
302 with 30% 1016II (Fig 2). In Miami-Dade, we were able to test four strains from Wynwood and  
303 three from Little River collected during the 2016 Zika response (Fig 3). Again, we observed  
304 variations in the levels of 1016II within each neighborhood. North Wynwood was slightly more  
305 than 25% IICC while south Wynwood was nearly 50%. In Little River, the four strains ranged  
306 from 20 to 60%. Just across the water from Wynwood, the Miami Beach strain was greater than  
307 90% IICC.

### 308 **Correlating *kdr* genotype with resistance ratio**

309 We regularly observed only six genotypes in the field (Table 4). Only a combined seven  
310 mosquitoes of the 4,810 analyzed in this study had genotypes of IIFF, IIFC, or VIFF, which  
311 would require an allele coding for a resistant isoleucine at 1016 (1016I) and a susceptible  
312 phenylalanine at 1534 (1534F) to be contributed from at least one parent. We did commonly  
313 observe the reverse where homozygous or heterozygous susceptible 1016V alleles paired with  
314 the homozygous resistant 1534C allele (VVCC or VICC). Plotting the combined dataset for  
315 strains with both *kdr* genotype frequencies and resistance ratios from topical application of  
316 permethrin showed a strong correlation between increasing RR and increasing 1016II frequency  
317 (Fig 4, Pearson correlation coefficient=0.905,  $P < 0.00001$ ,  $n=20$ ). Strains, like Miami Beach, Fort  
318 Myers, and New Port Richey, with high frequencies of 1016II, which, based on the rarity of IIFF  
319 and IIFC mosquitoes, implies the genotype IICC were the strains with the highest resistance

320 ratios. In contrast, the strain from Big Coppitt Key had the lowest 1016II frequency and the  
321 lowest RR even though the 1534CC frequency was relatively high.

322 **Figure 4. Regression of genotype IICC frequency to resistance ratio.** Plot of RR versus IICC  
323 frequency indicates a strong correlation between the two factors (Pearson's Correlation  $P=0.905$ ).  
324 Comparison of RR to other genotypes did not indicate a strong correlation (not shown).

325

326 Table 4. Combined genotype frequencies for 1016 and 1534 alleles in 4,810 Florida *Ae. aegypti*.

| <b>Genotype</b> | <b>Number identified</b> | <b>Frequencies</b> |
|-----------------|--------------------------|--------------------|
| VVFF            | 50                       | 0.01               |
| VVFC            | 55                       | 0.01               |
| VVCC            | 489                      | 0.1                |
| VIFF            | 3                        | 0                  |
| VIFC            | 184                      | 0.04               |
| VICC            | 1657                     | 0.34               |
| IIFC            | 2                        | 0                  |
| IIFC            | 2                        | 0                  |
| IICC            | 2366                     | 0.49               |

327

## 328 Discussion

329           Recent local transmission of Zika virus during 2016 and small outbreaks of dengue virus  
330 in 2010 and 2011 demonstrate that an effective IVM plan that attacks multiple life stages to  
331 reduce mosquito numbers is a necessity. However, when disease transmission is active, chemical  
332 adulticiding can be the only means to immediately reduce the population of potentially infected  
333 mosquitoes. While there is some debate as to overall efficacy of adulticiding against *Ae. aegypti*  
334 and *Ae. albopictus*, there is little question that it is a necessary part of the response that allows  
335 other slower methods of control like larviciding and source reduction to gain a foothold.  
336 Pyrethroids are the major class of chemical adulticides that Florida mosquito control programs  
337 use operationally. Thus, the efficacy of pyrethroids on *Aedes* vectors is a critically important part  
338 of a control program.

339           Direct topical application of permethrin clearly demonstrated that resistance was  
340 widespread in *Ae. aegypti* strains throughout Florida. RRs ranged from about 6-fold in strains  
341 from Manatee County and Big Coppitt Key to approximately 60-fold in Miami Beach, Cape  
342 Coral, and New Port Richey. Genotyping thousands of individuals indicated that common *kdr*  
343 alleles were also widely distributed in the state. While these findings are noteworthy as they  
344 represent the first published report of widespread pyrethroid resistance and *kdr* alleles in the  
345 southeast US, this result is not surprising and could be predicted based on the results from other  
346 locations including Puerto Rico, Mexico and, more recently, in invasive CA *Ae. aegypti* strains  
347 [9, 11, 18].

348           The dataset described in this study does reveal wide variations in both RR and *kdr* alleles  
349 within small geographic areas. Examining Miami-Dade County, the strain collected from Miami

350 Beach was highly resistant and had high levels of *kdr*. However, strains from inland Wynwood  
351 and Little River were much less resistant than the Miami Beach strain. Even strains from the  
352 opposite ends of neighborhoods differed. We saw this disparate pattern in south Miami-Dade,  
353 Manatee, and Lee counties. In Pasco County, we saw very different genotypes in strains  
354 geographically close to one another, separated only by a major highway. Considering this  
355 variability, along with the relatively short flight ranges and limited immigration in *Ae. aegypti*  
356 [30], the very different allele frequencies we observed in geographically close strains would  
357 support performing testing in numerous areas of a control district to get an accurate resistance  
358 picture.

359 In contrast to the resistance in the *Ae. aegypti* strains, we observed very little permethrin  
360 resistance in *Ae. albopictus* statewide. This was true whether *Ae. aegypti* were present or absent  
361 from the same collections. Waits et al. [22] showed very low levels of resistance in St. Johns  
362 County strains collected from areas without *Ae. aegypti*. Miami-Dade, Orange, and Lee counties  
363 all had the same pattern of resistant *Ae. aegypti* and much less resistant *Ae. albopictus*. It has  
364 been proposed that the development of pyrethroid resistance is much more difficult in *Ae.*  
365 *albopictus* due to sequence differences in the voltage-gated sodium channel (NaV) that make *kdr*  
366 much less likely, although recent reports indicate it may be possible [31, 32]. Our laboratory  
367 efforts to induce permethrin resistance in wildtype Florida *Ae. albopictus* by gentle pressuring  
368 have failed. At this time, pyrethroid resistance in Florida *Ae. albopictus* does not appear to be an  
369 issue that could lead to adulticide failure.

370 An important observation made due to this work is the correlation between increasing RR  
371 and the frequency of the IICC genotype in *Ae. aegypti*, which has been anecdotally observed in  
372 other studies using the CDC bottle bioassay [6, 9, 11, 33]. The linkage between *kdr* mutations

373 and a strong correlation with resistance ratios has also been observed in other dipterans [34, 35].  
374 While more research must be done to validate the correlation, this dataset adds another 20 strains  
375 with both resistance and *kdr* data that support using *kdr* genotype as a surrogate to estimate  
376 pyrethroid resistance levels in mosquitoes [36]. The use of allele frequencies has several  
377 potential benefits. Genotype data are relatively easy to collect, the results are produced in hours,  
378 and dead mosquitoes collected during standard surveillance activities can be used to provide  
379 information on resistance. With limited budgets and personnel at the operational vector control  
380 district level, predictive estimation of resistance levels could produce useful operational data  
381 from activities already being done without requiring additional efforts to collect or produce  
382 mosquitoes for bioassay testing.

383         Nearly a decade after Donnelly et al. [36] asked whether *kdr* genotypes are predictive in  
384 mosquitoes there is, to our knowledge, no published study that shows a pyrethroid-resistant  
385 strain of *Ae. aegypti* without also showing the presence of *kdr* alleles. We suggest that the major  
386 benefits to be gained from use of allele frequencies as an estimator of resistance would be  
387 improvements in coverage area (this study, 62 strains with allele frequencies vs. 26 by direct  
388 topical application) and better operational decision-making as vector control programs could  
389 access more timely information on area specific resistance levels. These challenges of getting  
390 wide coverage and providing this information on an operationally useful timeline have been  
391 present in recent response efforts to Zika virus. The efforts of CDC and vector control units in  
392 Puerto Rico and the efforts of the authors and others in Florida to develop wide-area pyrethroid  
393 resistance maps by relying strictly on bioassay data show that it is currently a slow, labor  
394 intensive process. In Florida at least, the epidemic had passed by the time more than a few strains  
395 had been tested by bioassay. Until there is reliable, published evidence to argue against the use of



396 *kdr* frequencies as a predictor, it is at present the only rapid way to assess strains across a large  
397 area.

398 This study shows that permethrin resistance is widely present in variable intensity in *Ae.*  
399 *aegypti* throughout Florida. This variability points to the need to include resistance testing as part  
400 of an IVM plan as well as examine resistance in more than one location. But how do we use this  
401 resistance information to improve vector control? Clearly, the strain of *Ae. aegypti* in Miami  
402 Beach is very different from nearby Wynwood and would likely call for different treatment  
403 strategies. A treatment with permethrin would likely have much less effect in Miami Beach in  
404 comparison to other less resistant locations.

405 Our study also points to the value of a collaborative approach from motivated  
406 stakeholders to develop resistance information. The state of Florida began regular conferences to  
407 bring together vector control districts, researchers, and public health resources months before the  
408 first locally transmitted case of Zika was reported in 2016. Like the CDC response in Puerto  
409 Rico, development of resistance information was an early and ongoing part of this process. The  
410 dataset in this study represents the result of thousands of hours of effort from vector control  
411 districts, vector control contractors, the state of Florida, and the federal government to produce  
412 operationally useful resistance information to protect public health and improve the efficacy of  
413 control operations. However, even with these efforts, this study is very limited in scope. We  
414 examined only permethrin resistance and although the literature shows the patterns we observed  
415 would likely be applicable to other pyrethroids [11, 15], work to define statewide patterns of  
416 resistance to synergized products or organophosphates still needs to be addressed.

## 417 **References**

- 418 1. Komalamisra N, Srisawat R, Apiwathanasorn C, Samung Y, Kaisri P. Residual effect of  
419 10% bifenthrin wp on mosquitoes, and community acceptance, in eastern Thailand.  
420 Southeast Asian Journal of Tropical Medicine and Public Health. 2009 Nov  
421 1;40(6):1221.
- 422 2. Soderlund, D.M. and Bloomquist, J.R., 1990. Molecular mechanisms of insecticide  
423 resistance. In *Pesticide resistance in arthropods*(pp. 58-96). Springer US.
- 424 3. Georghiou, George P. "Overview of insecticide resistance." 1990. 18-41.
- 425 4. Smith, L.B., Kasai, S. and Scott, J.G., 2016. Pyrethroid resistance in *Aedes aegypti* and  
426 *Aedes albopictus*: Important mosquito vectors of human diseases. *Pesticide Biochemistry*  
427 *and Physiology*,133, pp.1-12.
- 428 5. Brengues, C., Hawkes, N.J., Chandre, F., McCarroll, L., Duchon, S., Guillet, P.,  
429 Manguin, S., Morgan, J.C. and Hemingway, J., 2003. Pyrethroid and DDT  
430 cross-resistance in *Aedes aegypti* is correlated with novel mutations in the voltage-gated  
431 sodium channel gene. *Medical and Veterinary Entomology*, 17(1), pp.87-94.
- 432 6. Vera-Maloof, F.Z., Saavedra-Rodriguez, K., Elizondo-Quiroga, A.E., Lozano-Fuentes, S.  
433 and Black IV, W.C., 2015. Co-evolution of the Ile1, 016 and Cys1, 534 mutations in the  
434 voltage gated sodium channel gene of *Aedes aegypti* in Mexico. *PLoS Neglected Tropical*  
435 *Diseases*,9(12), p.e0004263.
- 436 7. Rodríguez, M.M., Bisset, J.A. and Fernández, D., 2007. Levels of insecticide resistance  
437 and resistance mechanisms in *Aedes aegypti* from some Latin American countries.  
438 *Journal of the American Mosquito Control Association*, 23(4), pp.420-429.
- 439 8. Harris, A.F., Rajatileka, S. and Ranson, H., 2010. Pyrethroid resistance in *Aedes aegypti*  
440 from Grand Cayman. *The American Journal of Tropical Medicine and Hygiene*, 83(2),  
441 pp.277-284.
- 442 9. García, G.P., Flores, A.E., Fernández-Salas, I., Saavedra-Rodríguez, K., Reyes-Solis, G.,  
443 Lozano-Fuentes, S., Bond, J.G., Casas-Martínez, M., Ramsey, J.M., García-Rejón, J. and  
444 Domínguez-Galera, M., 2009. Recent rapid rise of a permethrin knock down resistance  
445 allele in *Aedes aegypti* in Mexico. *PLoS Neglected Tropical Diseases*, 3(10), p.e531.
- 446 10. Linss, J.G.B., Brito, L.P., Garcia, G.A., Araki, A.S., Bruno, R.V., Lima, J.B.P., Valle, D.  
447 and Martins, A.J., 2014. Distribution and dissemination of the Val1016Ile and  
448 Phe1534Cys *Kdr* mutations in *Aedes aegypti* Brazilian natural ss. *Parasites & Vectors*,  
449 7(1), p.25.
- 450 11. Ponce-García, G., Del Río-Galvan, S., Barrera, R., Saavedra-Rodriguez, K., Villanueva-  
451 Segura, K., Felix, G., Amador, M. and Flores, A.E., 2016. Knockdown Resistance  
452 Mutations in *Aedes aegypti* (Diptera: Culicidae) From Puerto Rico. *Journal of Medical*  
453 *Entomology*, 53(6), pp.1410-1414.
- 454 12. CDC 2016, <https://www.cdc.gov/zika/vector/testing-puertorico.html>

- 455 13. Hemingway, J., Boddington, R.G., Harris, J. and Dunbar, S.J., 1989. Mechanisms of  
456 insecticide resistance in *Aedes aegypti* (L.)(Diptera: Culicidae) from Puerto Rico.  
457 Bulletin of Entomological Research, 79(1), pp.123-130.
- 458 14. Reid, W.R., Thornton, A., Pridgeon, J.W., Becnel, J.J., Tang, F., Estep, A., Clark, G.G.,  
459 Allan, S. and Liu, N., 2014. Transcriptional analysis of four family 4 P450s in a Puerto  
460 Rico strain of *Aedes aegypti* (Diptera: Culicidae) compared with an Orlando strain and  
461 their possible functional roles in permethrin resistance. Journal of medical entomology,  
462 51(3), pp.605-615.
- 463 15. Estep, A.S., Sanscrainte, N.D., Waits, C.M., Louton, J.E. and Becnel, J.J., 2017.  
464 Resistance Status and Resistance Mechanisms in a Strain of *Aedes aegypti* (Diptera:  
465 Culicidae) From Puerto Rico. Journal of Medical Entomology, 54(6), pp.1643-1648.
- 466 16. Agramonte, N.M., Bloomquist, J.R. and Bernier, U.R., 2017. Pyrethroid resistance alters  
467 the blood-feeding behavior in Puerto Rican *Aedes aegypti* mosquitoes exposed to treated  
468 fabric. PLOS Neglected Tropical Diseases, 11(9), p.e0005954.
- 469 17. Vontas, J., Kioulos, E., Pavlidi, N., Morou, E., Della Torre, A. and Ranson, H., 2012.  
470 Insecticide resistance in the major dengue vectors *Aedes albopictus* and *Aedes aegypti*.  
471 Pesticide Biochemistry and Physiology, 104(2), pp.126-131.
- 472 18. Cornel, A.J., Holeman, J., Nieman, C.C., Lee, Y., Smith, C., Amorino, M., Brisco, K.K.,  
473 Barrera, R., Lanzaro, G.C. and Mulligan III, F.S., 2016. Surveillance, insecticide  
474 resistance and control of an invasive *Aedes aegypti* (Diptera: Culicidae) in California.  
475 F1000Research, 5.
- 476 19. Richards, S.L., Balanay, J.A.G., Fields, M. and Vandock, K., 2017. Baseline Insecticide  
477 Susceptibility Screening Against Six Active Ingredients for *Culex* and *Aedes* (Diptera:  
478 Culicidae) Mosquitoes in the United States. Journal of Medical Entomology, 54(3),  
479 pp.682-695.
- 480 20. Parker et al-in prep
- 481 21. Marcombe, S., Farajollahi, A., Healy, S.P., Clark, G.G. and Fonseca, D.M., 2014.  
482 Insecticide resistance status of United States populations of *Aedes albopictus* and  
483 mechanisms involved. PLOS ONE, 9(7), p.e101992.
- 484 22. Waits, C.M., Fulcher, A., Louton, J.E., Richardson, A.G., Becnel, J.J., Xue, R.D. and  
485 Estep, A.S., 2017. A comparative analysis of resistance testing methods in *Aedes*  
486 *albopictus* (Diptera: Culicidae) from St. Johns County, Florida. Florida Entomologist,  
487 100(3), pp.571-577.
- 488 23. CDC 2017, <https://www.cdc.gov/zika/vector/vector-control.html>
- 489 24. Pridgeon, J.W., Pereira, R.M., Becnel, J.J., Allan, S.A., Clark, G.G. and Linthicum, K.J.,  
490 2008. Susceptibility of *Aedes aegypti*, *Culex quinquefasciatus* Say, and *Anopheles*  
491 *quadrimaculatus* Say to 19 pesticides with different modes of action. Journal of Medical  
492 Entomology, 45(1), pp.82-87.

- 493 25. Chang, F., Dutta, S., Becnel, J.J., Estep, A.S. and Mascal, M., 2013. Synthesis of the  
494 Insecticide Prothrin and Its Analogues from Biomass-Derived 5-(Chloromethyl) furfural.  
495 J. Agriculture and Food Chemistry 2014, 62, 476–480.
- 496 26. WHO. 2016. Monitoring and managing insecticide resistance in *Aedes* mosquito  
497 populations: Interim guide for entomologists.  
498 [http://apps.who.int/iris/bitstream/10665/204588/2/WHO\\_ZIKV\\_VC\\_16.1\\_eng.pdf](http://apps.who.int/iris/bitstream/10665/204588/2/WHO_ZIKV_VC_16.1_eng.pdf)
- 499 27. Chouaibou MS, Chabi J, Bingham GV, Knox TB, N'Dri L, Kesse NB, Bonfoh B, Jamet  
500 HV. Increase in susceptibility to insecticides with aging of wild *Anopheles gambiae*  
501 mosquitoes from Côte d'Ivoire. BMC Infectious Diseases. 2012 Dec;12(1):214.
- 502 28. Saavedra-Rodriguez, K., Urdaneta-Marquez, L., Rajatileka, S., Moulton, M., Flores,  
503 A.E., Fernandez-Salas, I., Bisset, J., Rodriguez, M., McCall, P.J., Donnelly, M.J. and  
504 Ranson, H., 2007. A mutation in the voltage-gated sodium channel gene associated with  
505 pyrethroid resistance in Latin American *Aedes aegypti*. Insect Molecular Biology, 16(6),  
506 pp.785-798.
- 507 29. Yanola, J., Somboon, P., Walton, C., Nachaiwieng, W., Somwang, P. and Prapanthadara,  
508 L.A., 2011. High-throughput assays for detection of the F1534C mutation in the voltage-  
509 gated sodium channel gene in permethrin-resistant *Aedes aegypti* and  
510 the distribution of this mutation throughout Thailand. Tropical Medicine & International  
511 Health, 16(4), pp.501-509.
- 512 30. Harrington, L.C., Scott, T.W., Lerdthusnee, K., Coleman, R.C., Costero, A., Clark, G.G.,  
513 Jones, J.J., Kitthawee, S., Kittayapong, P., Sithiprasasna, R. and Edman, J.D., 2005.  
514 Dispersal of the dengue vector *Aedes aegypti* within and between rural communities. The  
515 American Journal of Tropical Medicine and Hygiene, 72(2), pp.209-220.
- 516 31. Kasai, S., Ng, L.C., Lam-Phua, S.G., Tang, C.S., Itokawa, K., Komagata, O., Kobayashi,  
517 M. and Tomita, T., 2011. First detection of a putative knockdown resistance gene in  
518 major mosquito vector, *Aedes albopictus*. Japanese Journal of Infectious Diseases, 64(3),  
519 pp.217-221.
- 520 32. Ishak, I.H., Jaal, Z., Ranson, H. and Wondji, C.S., 2015. Contrasting patterns of  
521 insecticide resistance and knockdown resistance (*kdr*) in the dengue vectors *Aedes*  
522 *aegypti* and *Aedes albopictus* from Malaysia. Parasites & Vectors, 8(1), p.181.
- 523 33. Harris, A.F., Rajatileka, S. and Ranson, H., 2010. Pyrethroid resistance in *Aedes aegypti*  
524 from Grand Cayman. The American Journal of Tropical Medicine and Hygiene, 83(2),  
525 pp.277-284.
- 526 34. Jamroz, R.C., Guerrero, F.D., Kammlah, D.M. and Kunz, S.E., 1998. Role of the *kdr* and  
527 super-*kdr* sodium channel mutations in pyrethroid resistance: correlation of allelic  
528 frequency to resistance level in wild and laboratory populations of horn flies  
529 (*Haematobia irritans*). Insect Biochemistry and Molecular Biology, 28(12), pp.1031-  
530 1037.

- 531 35. Williamson, M.S., Martinez-Torres, D., Hick, C.A. and Devonshire, A.L., 1996.  
532 Identification of mutations in the housefly *para*-type sodium channel gene associated  
533 with knockdown resistance (*kdr*) to pyrethroid insecticides. *Molecular and General*  
534 *Genetics MGG*, 252(1), pp.51-60.
- 535 36. Donnelly, M.J., Corbel, V., Weetman, D., Wilding, C.S., Williamson, M.S. and Black IV,  
536 W.C., 2009. Does *kdr* genotype predict insecticide-resistance phenotype in mosquitoes?  
537 *Trends in Parasitology*, 25(5), pp.213-219.

538

## 539 **Supporting Information Legends**

- 540 **Supporting File 1. *Collection information and kdr data for strains used in this study.*** This  
541 excel file contains detailed location information on collection sites, lifestages tested,  
542 numbers of organisms tested and raw *kdr* allele data.

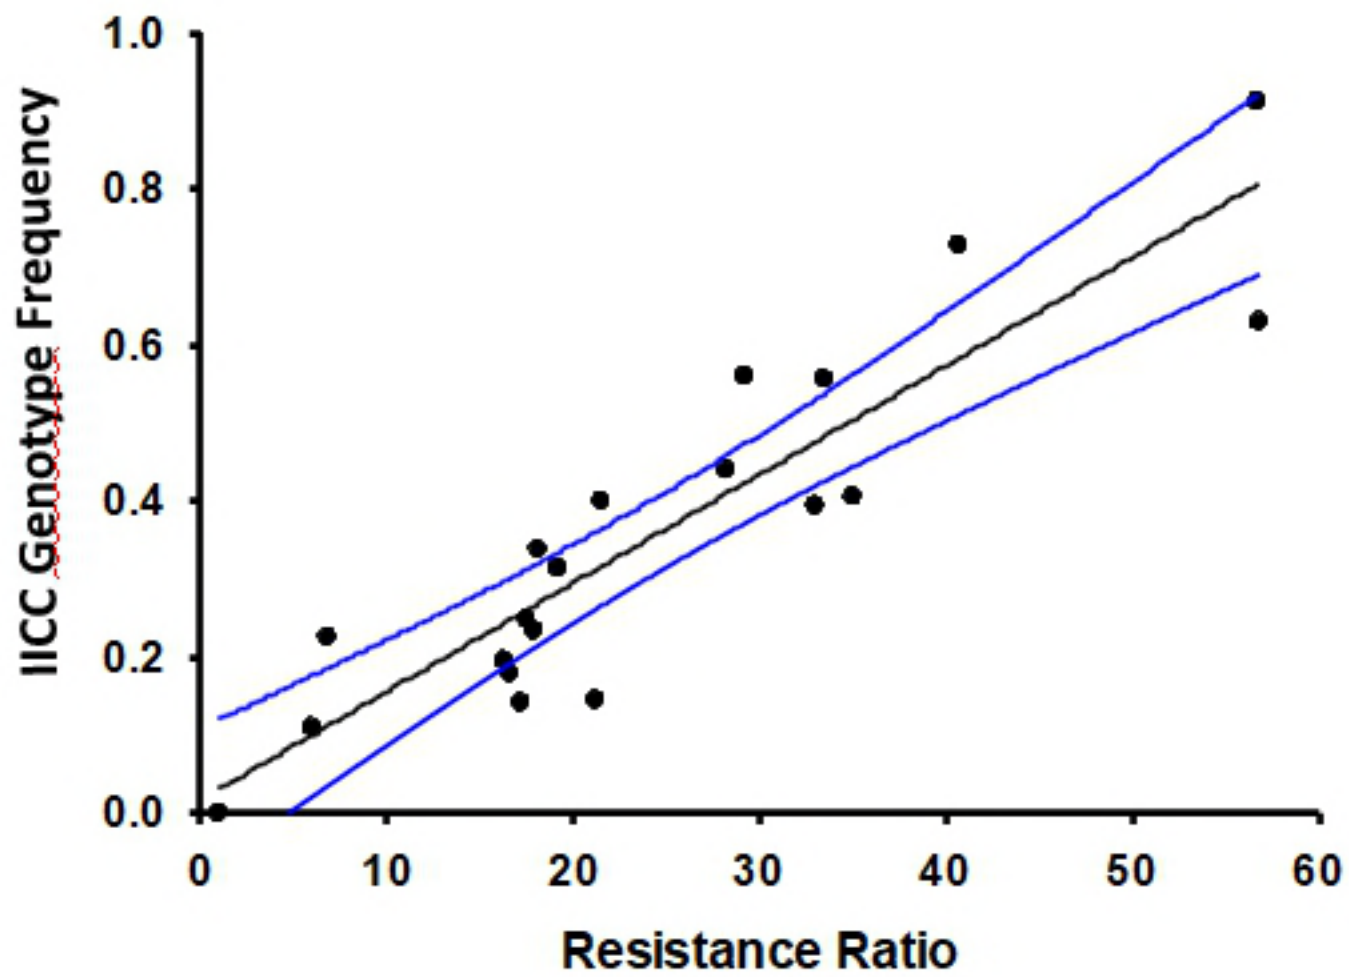



IICC IIFC IIFF VICC VIFC VIFF VVCC VVFC VVFF

0 30 60mi

bioRxiv preprint doi: <https://doi.org/10.1101/365171>; this version posted July 9, 2018. The copyright holder for this preprint (which was not certified by peer review) is the author/funder. This article is a US Government work. It is not subject to copyright under 17 USC 105 and is also made available for use under a CC0 license.

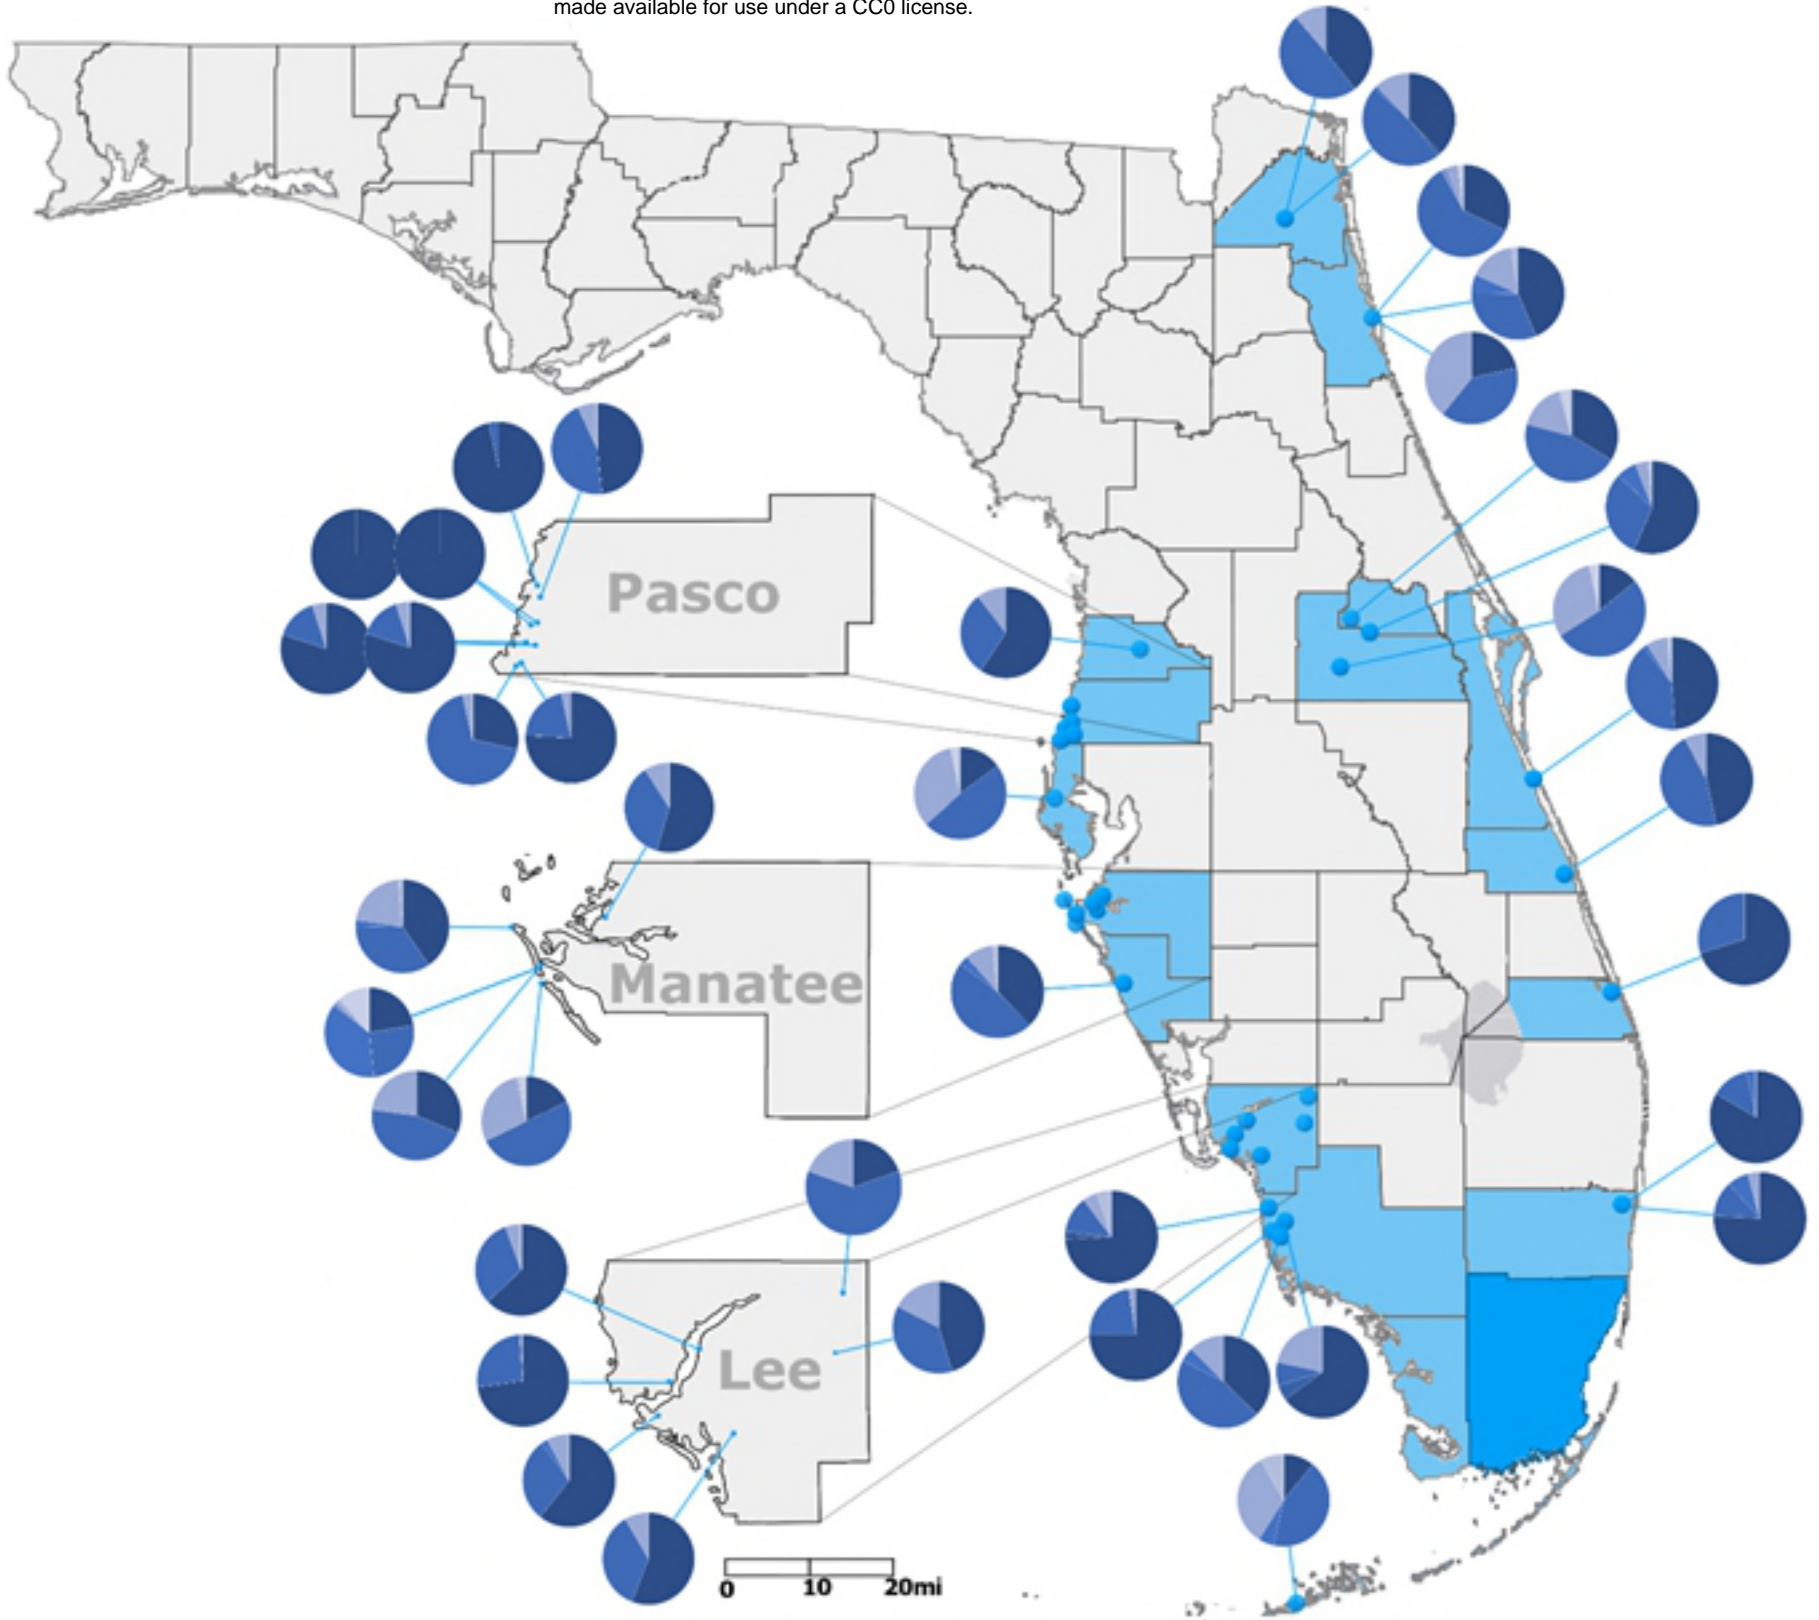

bioRxiv preprint doi: <https://doi.org/10.1101/365171>; this version posted July 9, 2018. The copyright holder for this preprint (which was not certified by peer review) is the author/funder. This article is a US Government work. It is not subject to copyright under 17 USC 105 and is also made available for use under a CC0 license.

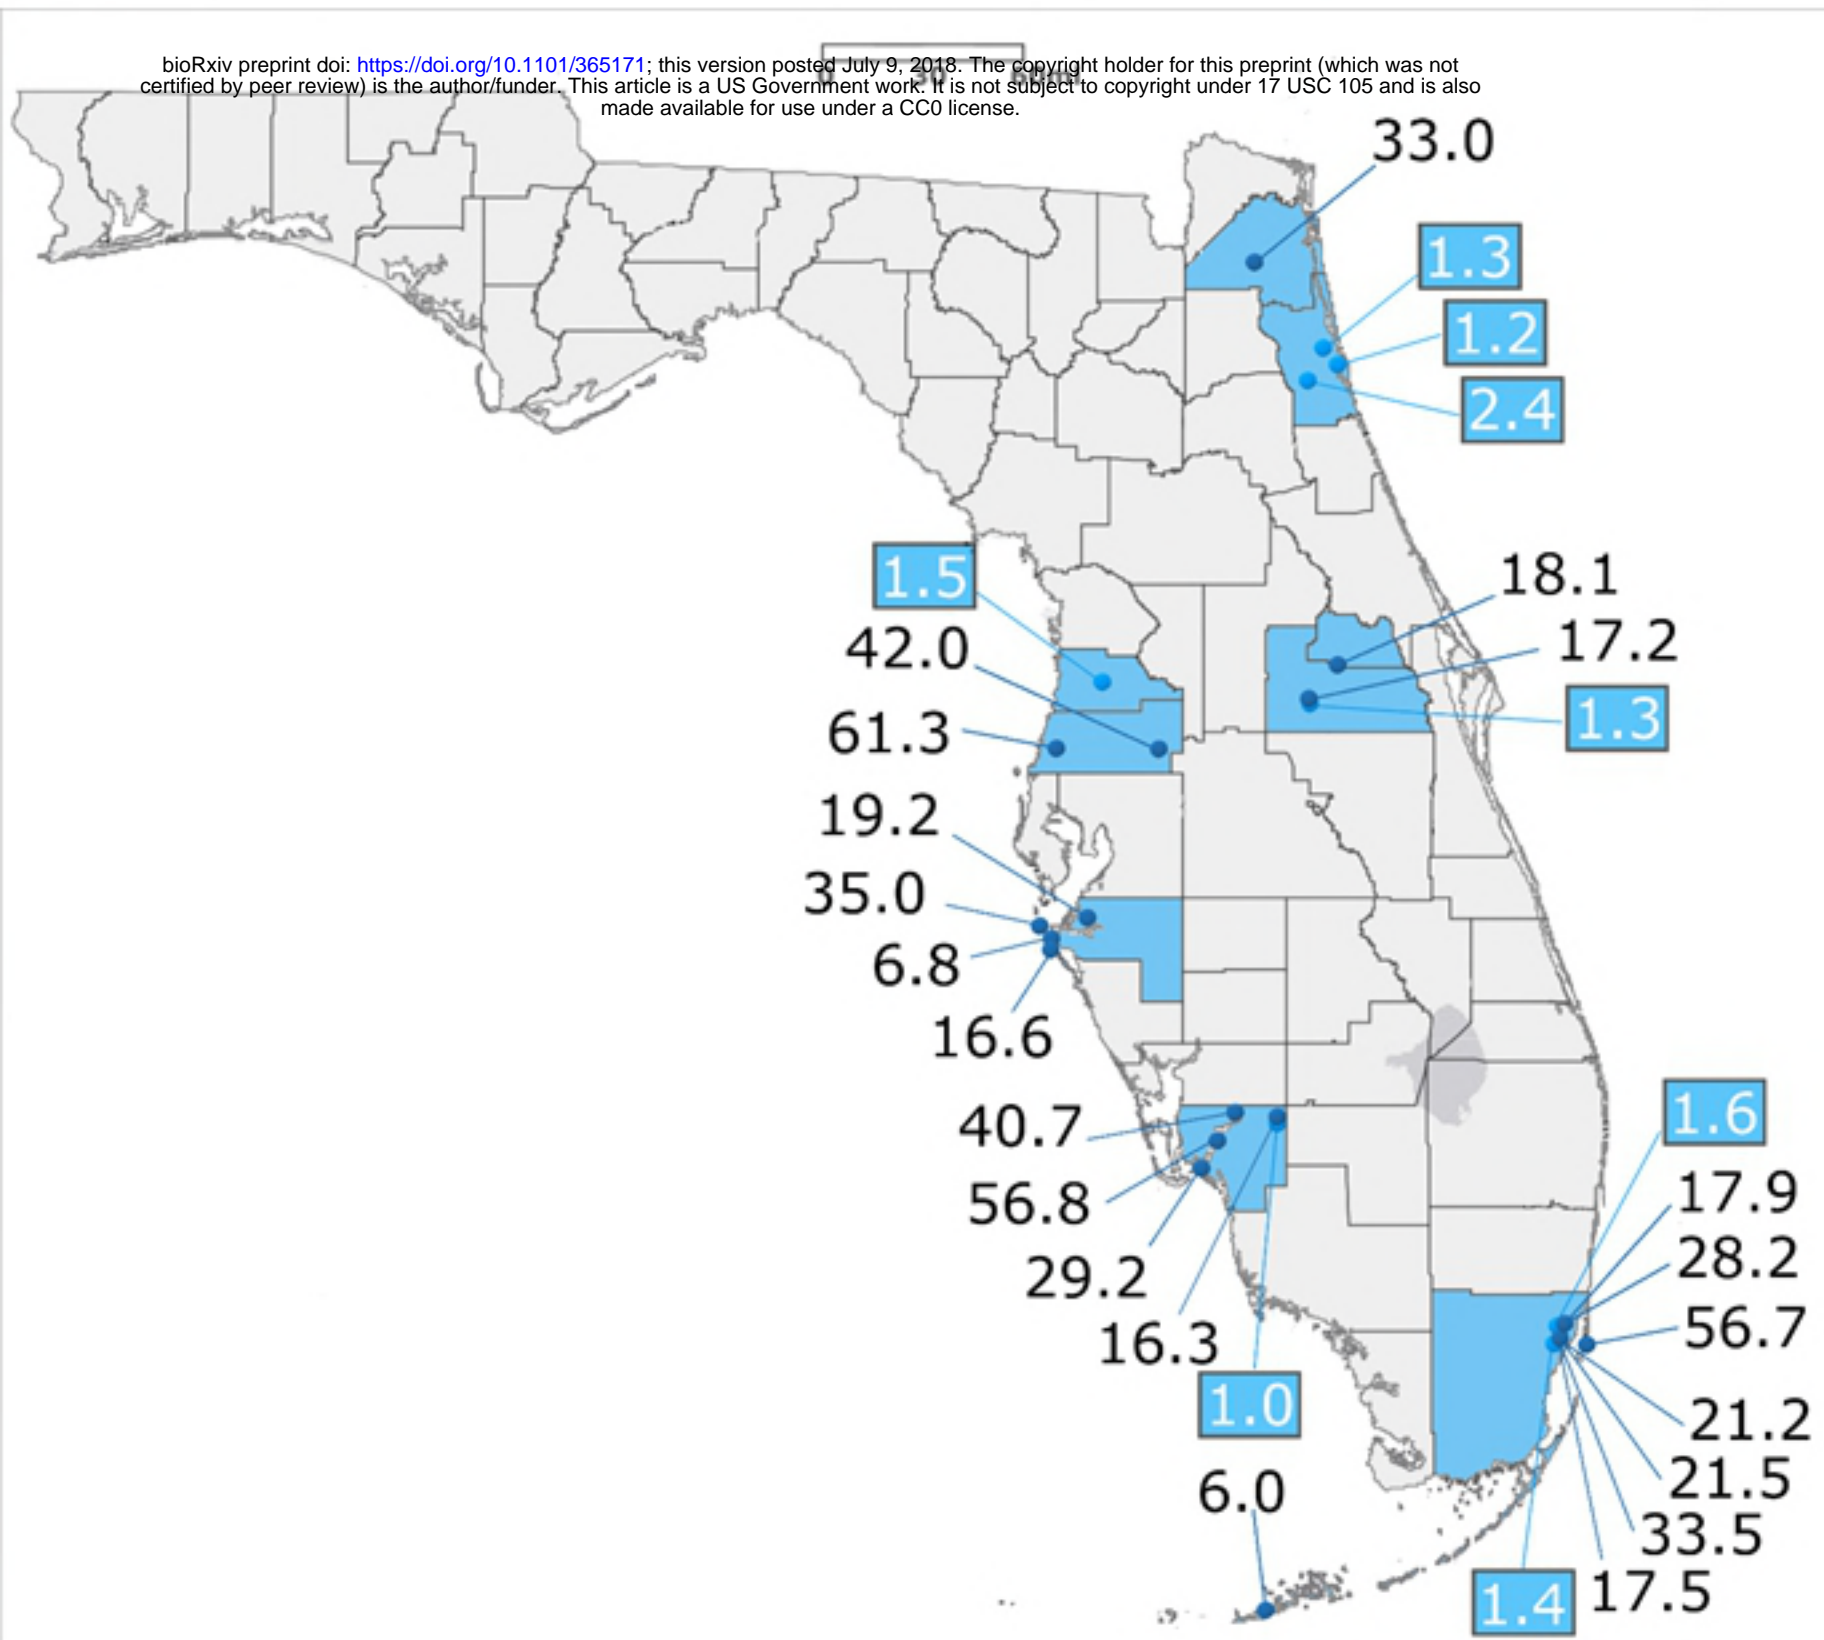



bioRxiv preprint doi: <https://doi.org/10.1101/365171>; this version posted July 9, 2018. The copyright holder for this preprint (which was not certified by peer review) is the author/funder. This article is a US Government work. It is not subject to copyright under 17 USC 105 and is also made available for use under a CC0 license.

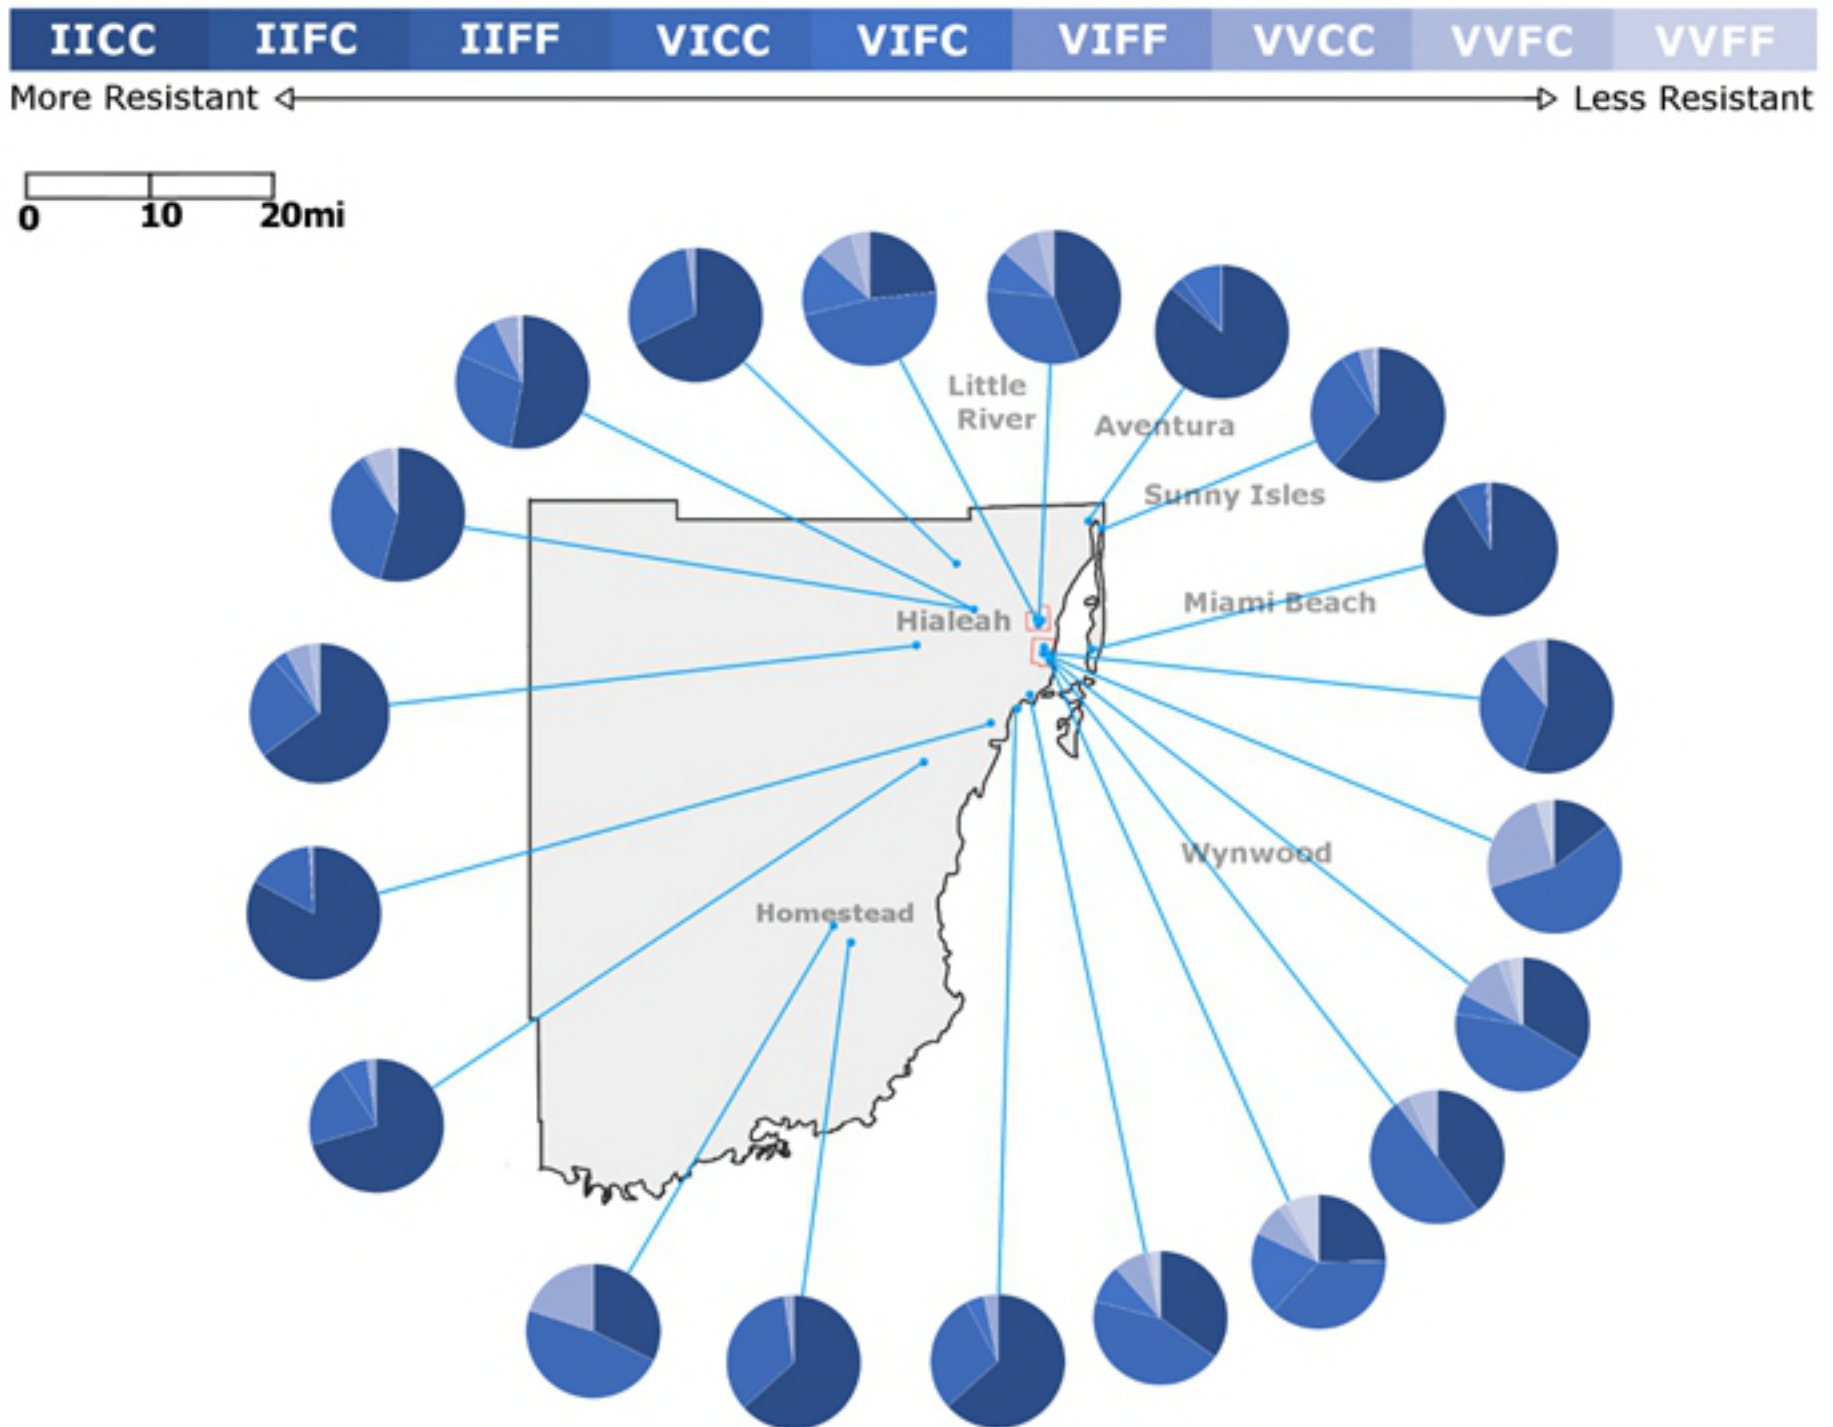

Source: https://www.biorxiv.org/content/10.1101/365171v1.full.pdf
